# Supplementary material
Source: MDPI journal article supplement (https://www.mdpi.com/2073-4344/9/3/288)

## Supplementary material

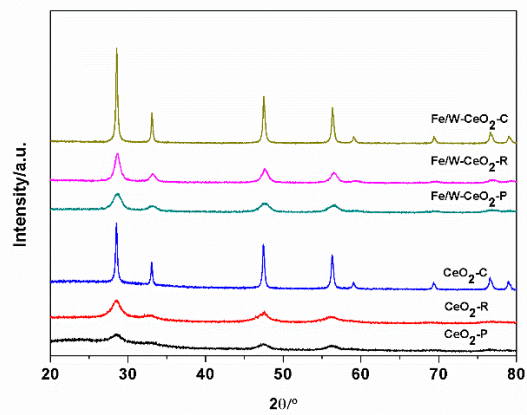

**Figure S1.** XRD patterns of Fe/W-CeO<sub>2</sub> and CeO<sub>2</sub> catalysts.

Supplement: s1 [file s1]
